# Supplementary material for: Anti-Pigmentary Effect of (-)-4-Hydroxysattabacin from the Marine-Derived Bacterium Bacillus sp
Source: Mar Drugs. 2017 May 13;15(5):138. doi: 10.3390/md15050138 (PMC5450544; doi:10.3390/md15050138)

# Supplementary Materials: Anti-pigmentary Effect of (–)-4-Hydroxysattabacin from a Marine-derived Bacterium *Bacillus* sp.

Kyuri Kim,<sup>†</sup> Alain S. Leutou,<sup>‡</sup> Haein Jeong,<sup>‡</sup> Dayoung Kim,<sup>‡</sup> Chi Nam Seong,<sup>⊥</sup> Sang-Jip Nam,<sup>\*,‡</sup> and Kyung-Min Lim<sup>\*,†</sup>

<sup>†</sup>College of Pharmacy, Ewha Womans University, Seoul, 120-750, Republic of Korea

<sup>‡</sup>Department of Chemistry and Nano Science, Global Top 5 program, Ewha Womans University, Seoul 03760, Korea

<sup>⊥</sup>Department of Biology, College of Life Science and Natural Resource, Sunchon National University, Suncheon, 540-742, Republic of Korea

## Table of Contents

|                                                                                                                                       |    |
|---------------------------------------------------------------------------------------------------------------------------------------|----|
| <b>Figure S1.</b> Effect of crude extract of <i>Bacillus</i> sp., SC0147, on melanin contents and cell viability of B16F10 cell ..... | S3 |
| <b>Figure S2.</b> <sup>1</sup> H NMR Spectrum (500 MHz) of 4-Hydroxysattabacin in CDCl <sub>3</sub> .....                             | S4 |
| <b>Figure S3.</b> <sup>13</sup> C NMR Spectrum (125 MHz) of 4-Hydroxysattabacin in CDCl <sub>3</sub> .....                            | S5 |
| <b>Figure S4.</b> <sup>1</sup> H NMR Spectrum (500 MHz) of Sattabacin in MeOD.....                                                    | S6 |
| <b>Figure S5.</b> <sup>13</sup> C NMR Spectrum (125 MHz) of Sattabacin in MeOD.....                                                   | S7 |
| <b>Figure S6.</b> CD Spectra of 4-Hydroxysattabacin and Sattabacin.....                                                               | S8 |

**Figure S1. Effect of crude extract of *Bacillus* sp., SC0147, on melanin contents and cell viability of B16F10 cell**

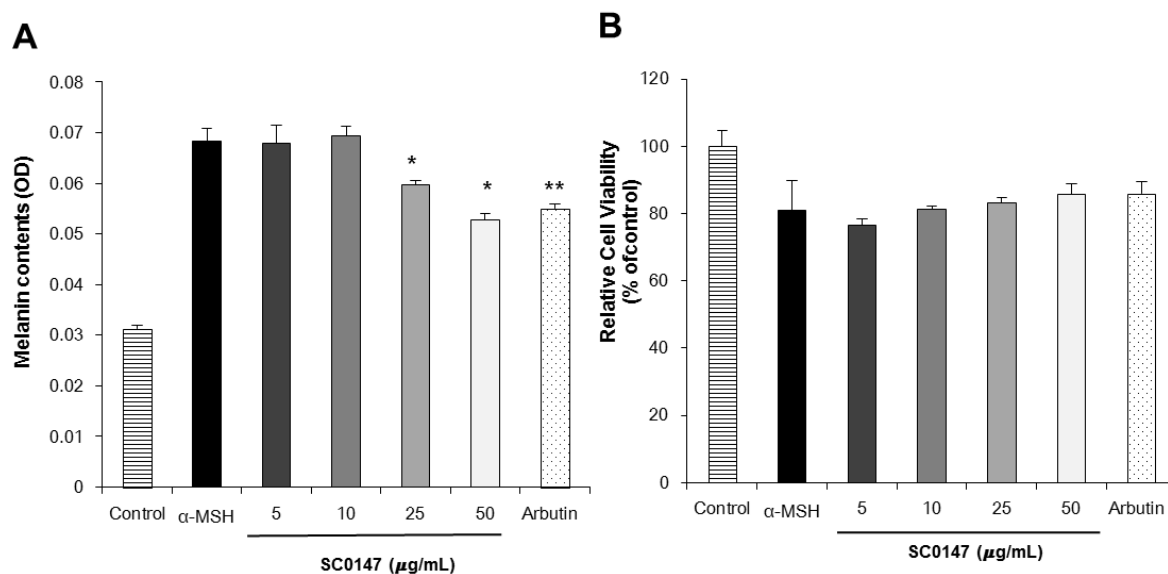

(A) Measure of melanin contents (N=3) by 1M NaOH, and (B) measure of Cell viability by WST-1 assay. B16 cells were treated with 0.5  $\mu$ M  $\alpha$ -MSH in the presence or absence of indicated concentration of SC0147 for 72 h.

**Figure S2.  $^1\text{H}$  NMR Spectrum (500 MHz) of 4-Hydroxysattabacin in  $\text{CDCl}_3$**

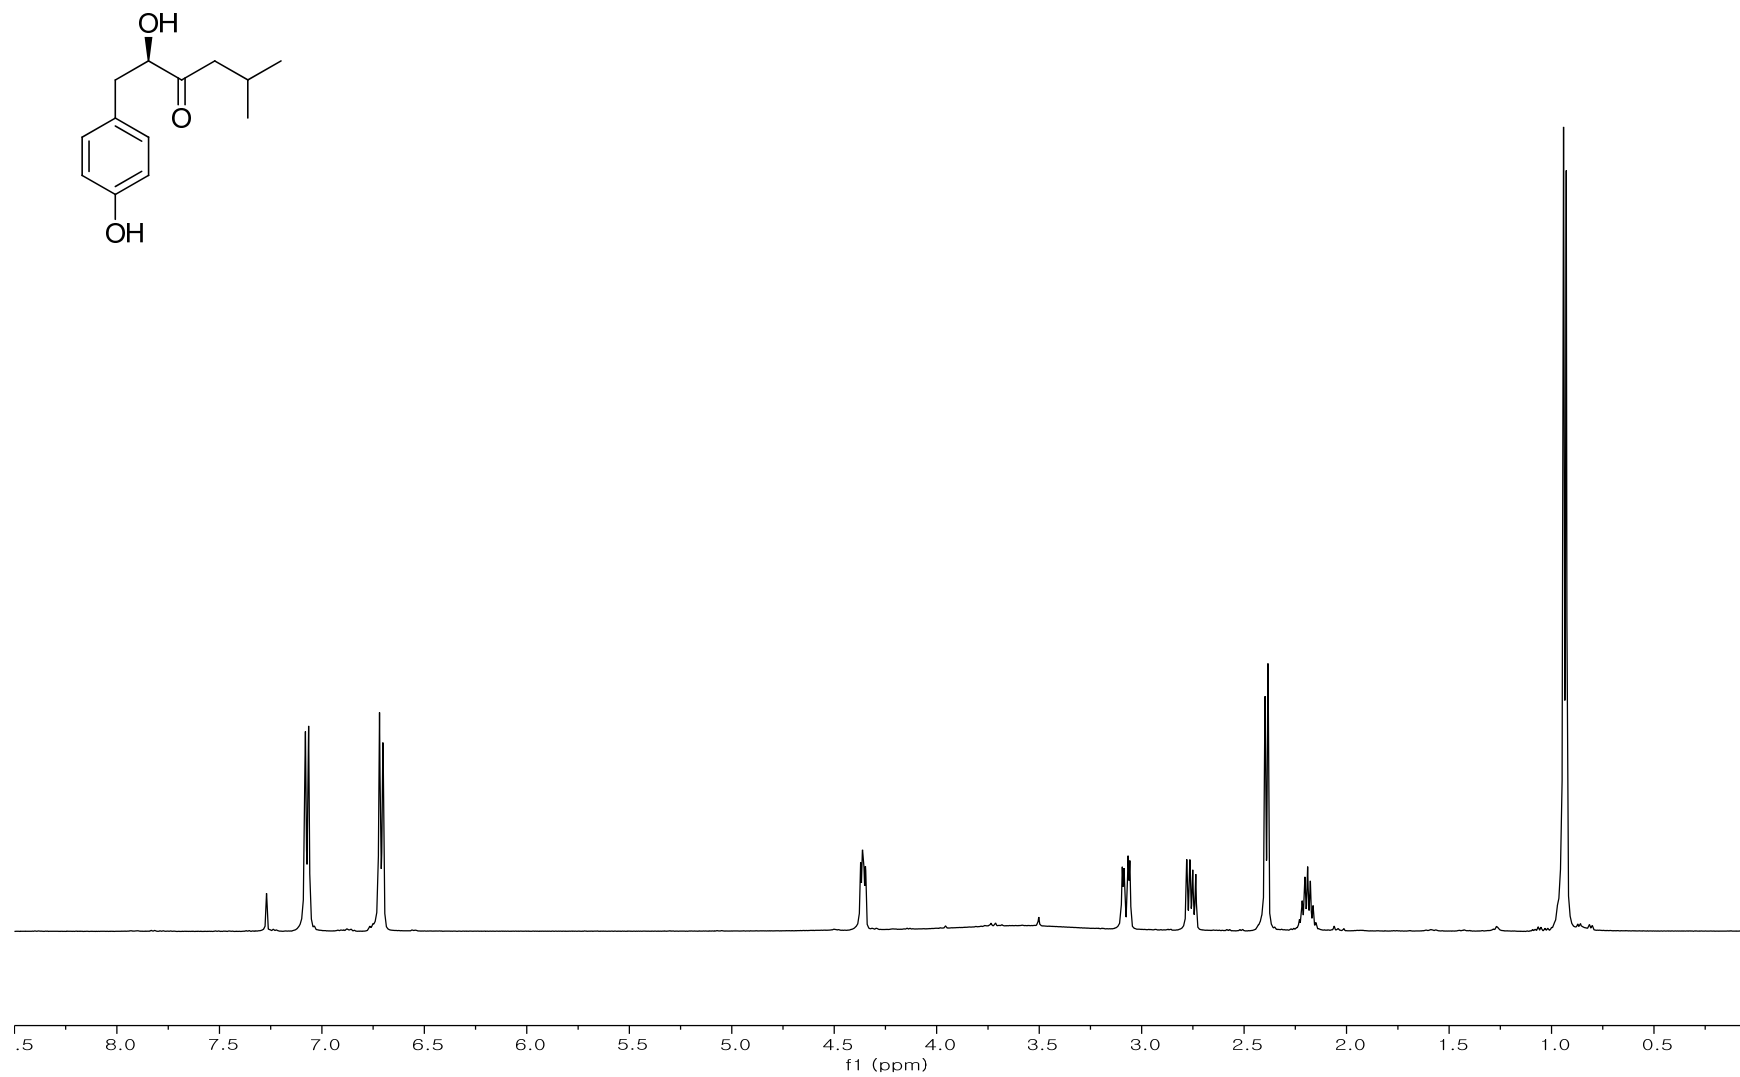

**Figure S3.  $^{13}\text{C}$  NMR Spectrum (125 MHz) of 4-Hydroxysattabacin in  $\text{CDCl}_3$**

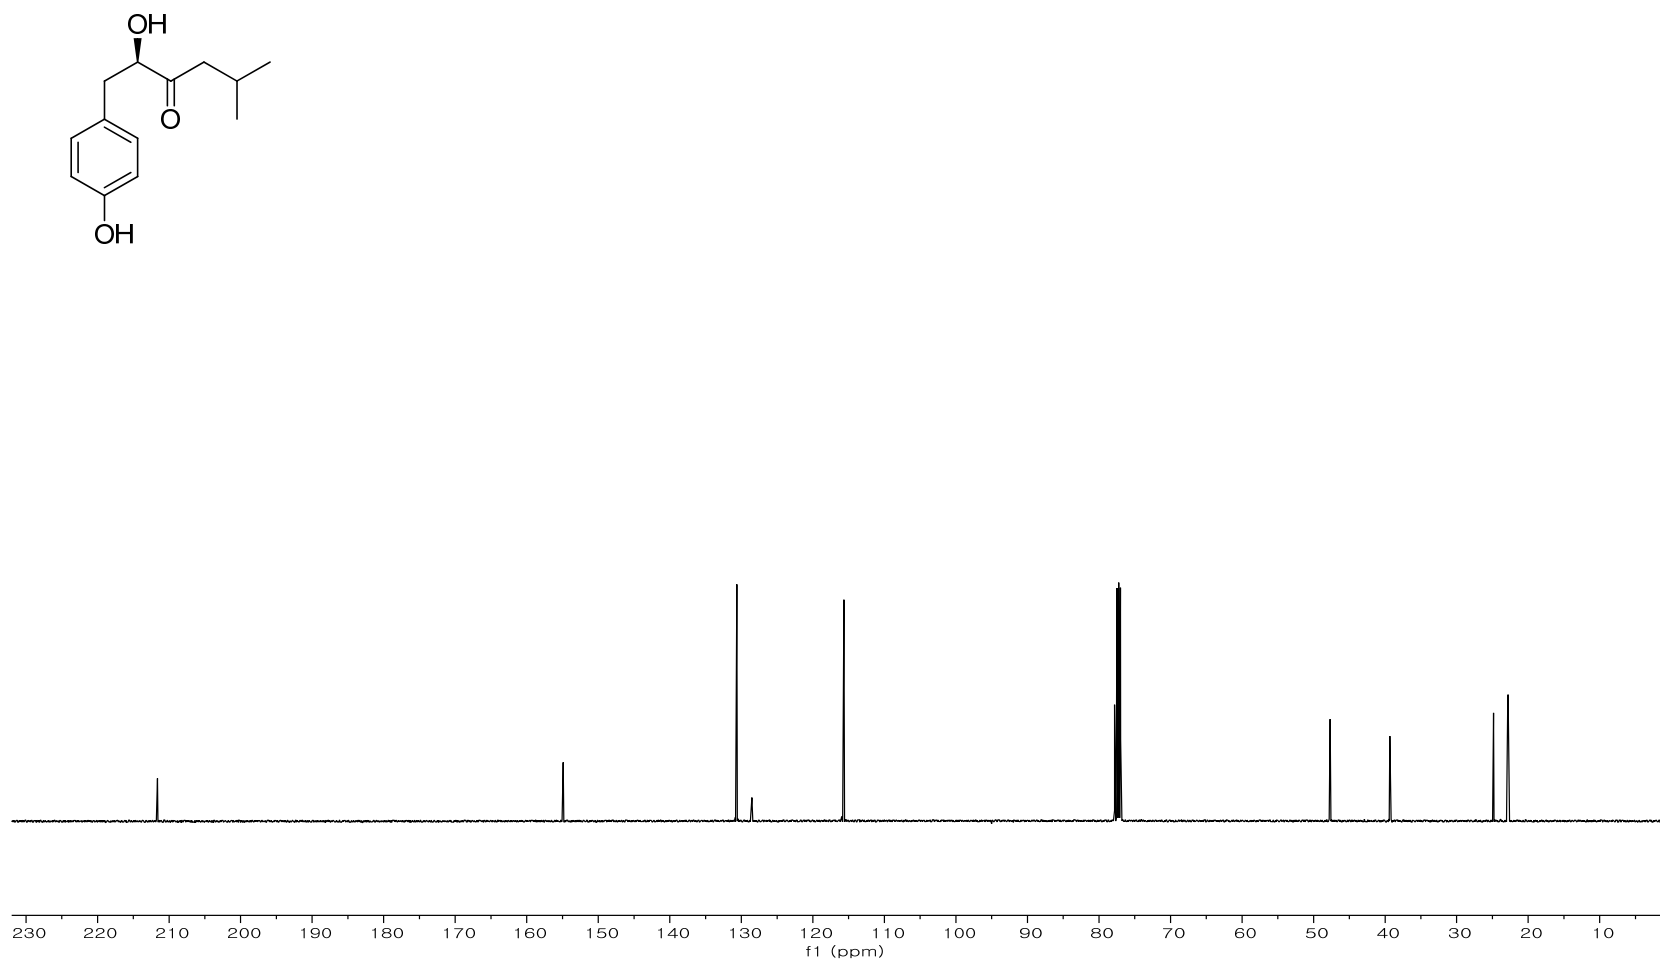

**Figure S4.  $^1\text{H}$  NMR Spectrum (500 MHz) of Sattabacin in MeOD**

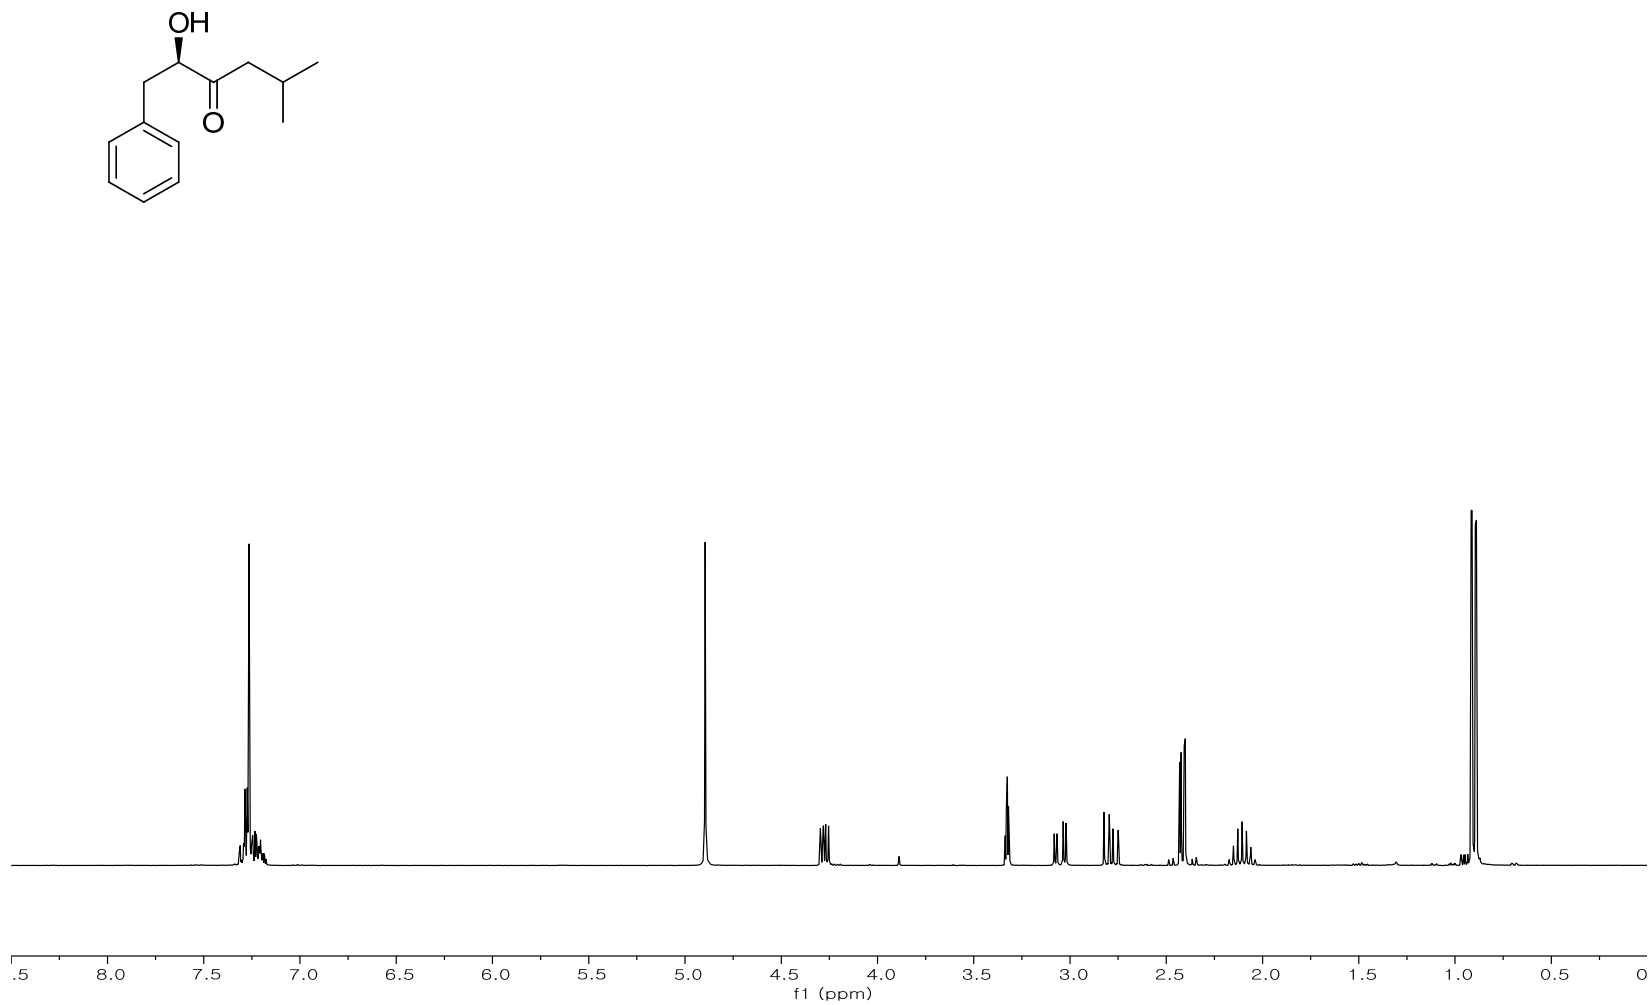

Figure S5.  $^{13}\text{C}$  NMR Spectrum (125 MHz) of Sattabacin in MeOD

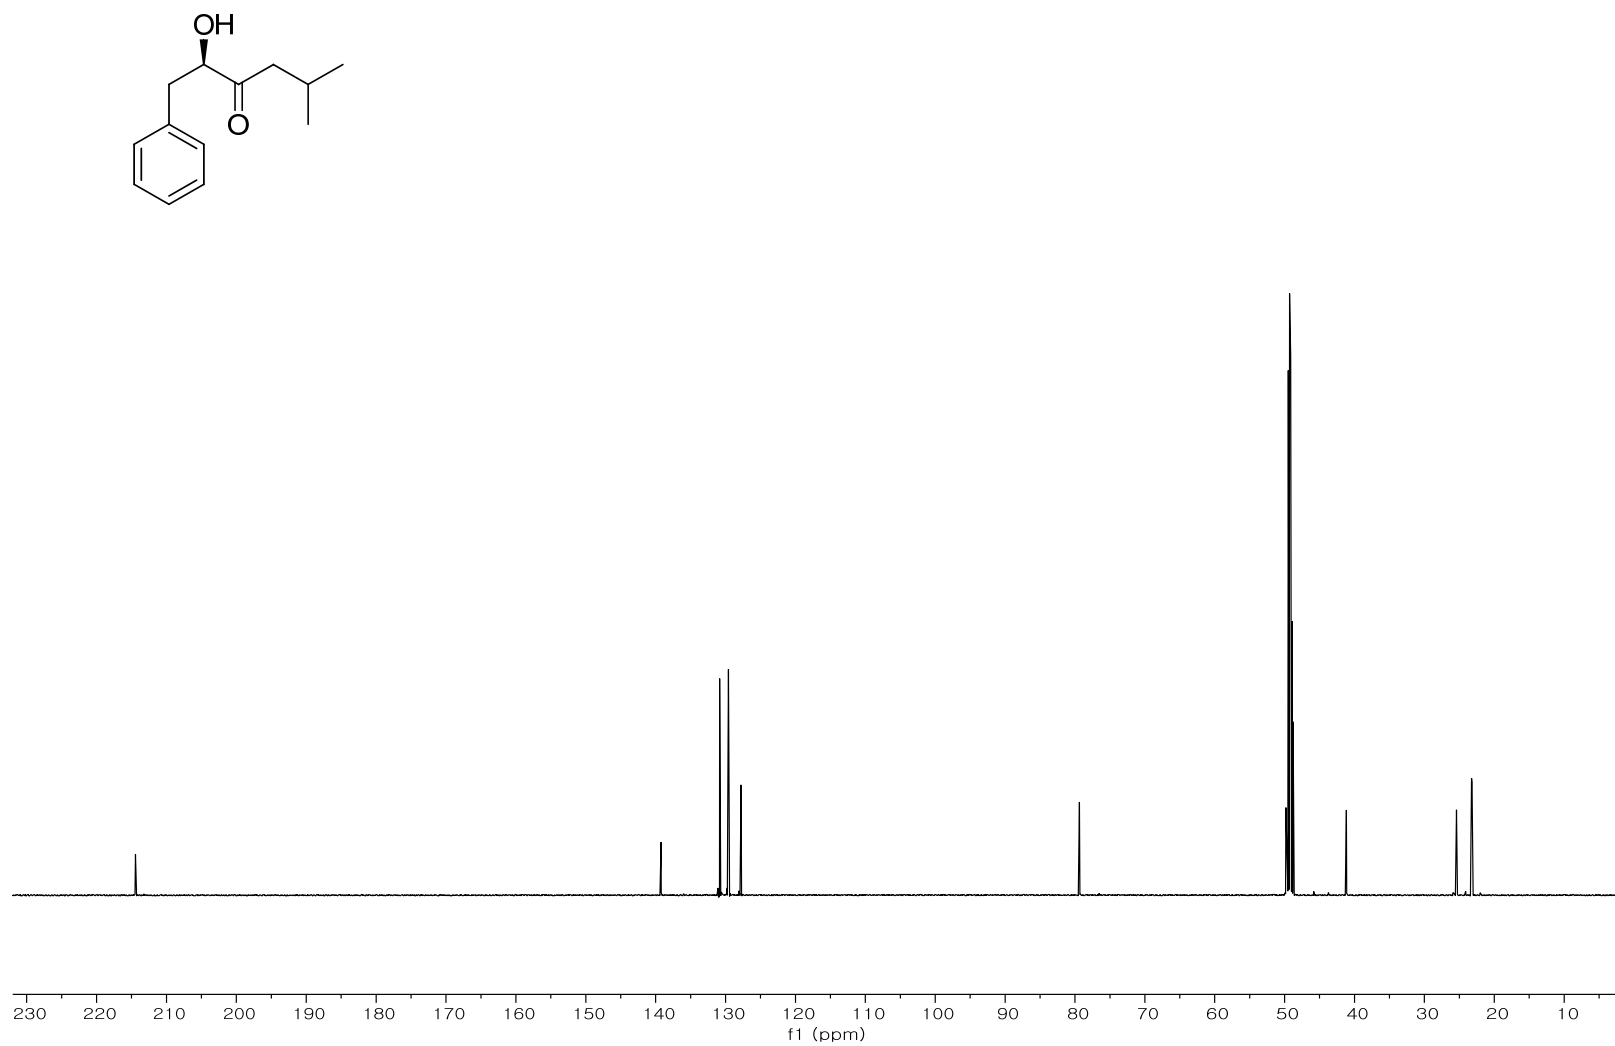

Figure S6. CD Spectra of 4-Hydroxysattabacin and Sattabacin

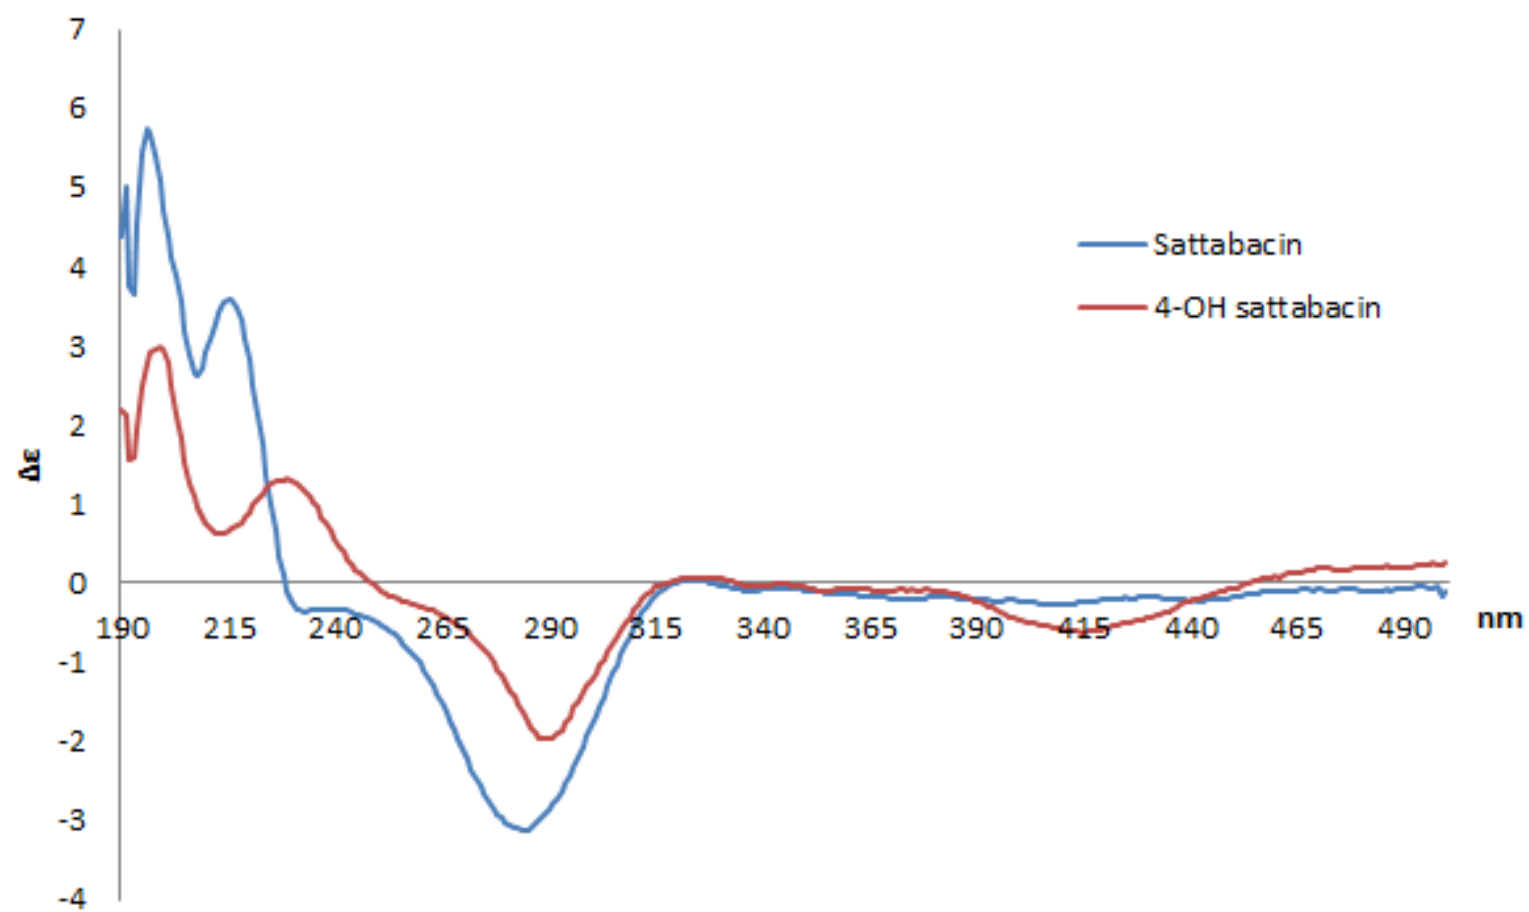

Supplement: Supplementary file 1 [file marinedrugs-15-00138-s001.pdf]
